# Supplementary material for: Comparative Water Environment Simulation Study of Two Typical Models with BMPs in a Karst Basin
Source: MDPI journal article supplement (doi:10.3390/agriculture12010069), 2022-01-06
Supplement: s1 [file s1]

**Table S1.** Water balance in karst and non-karst areas (unit: mm).

| Year    | Area      | PREC    | SURQ    | LATQ   | PERC   | ET     | $\Delta S_w$ |
|---------|-----------|---------|---------|--------|--------|--------|--------------|
| 2006    | Karst     | 1728.21 | 634.93  | 51.67  | 521.83 | 541.20 | 21.41        |
|         | Non-karst | 1778.80 | 712.47  | 83.42  | 499.26 | 520.58 | -36.93       |
| 2007    | Karst     | 1405.87 | 420.63  | 40.02  | 386.49 | 551.95 | 6.78         |
|         | Non-karst | 1434.74 | 465.82  | 65.44  | 358.46 | 525.75 | 19.27        |
| 2008    | Karst     | 1852.15 | 802.38  | 46.25  | 532.15 | 538.07 | 66.69        |
|         | Non-karst | 1999.72 | 866.40  | 85.17  | 486.99 | 548.79 | 12.36        |
| 2009    | Karst     | 1424.08 | 564.23  | 35.48  | 373.89 | 510.40 | 59.92        |
|         | Non-karst | 1586.07 | 626.89  | 67.29  | 299.67 | 511.24 | 80.98        |
| 2010    | Karst     | 1507.91 | 601.75  | 38.53  | 459.40 | 488.76 | 80.53        |
|         | Non-karst | 1718.45 | 682.53  | 76.33  | 398.29 | 490.71 | 70.58        |
| 2011    | Karst     | 918.55  | 238.00  | 24.50  | 246.39 | 500.00 | 90.34        |
|         | Non-karst | 996.38  | 255.77  | 46.86  | 204.38 | 501.84 | -12.47       |
| 2012    | Karst     | 1815.86 | 670.17  | 49.34  | 526.21 | 529.26 | 40.89        |
|         | Non-karst | 1907.97 | 729.63  | 86.64  | 496.48 | 539.53 | 55.69        |
| 2013    | Karst     | 1706.40 | 644.61  | 46.37  | 487.65 | 556.01 | 28.24        |
|         | Non-karst | 1747.06 | 698.48  | 80.91  | 426.41 | 565.63 | -24.36       |
| 2014    | Karst     | 1790.18 | 642.72  | 50.24  | 515.89 | 555.48 | 25.84        |
|         | Non-karst | 1792.98 | 713.36  | 84.25  | 481.06 | 563.29 | -48.98       |
| 2015    | Karst     | 2857.14 | 1510.20 | 69.11  | 821.73 | 524.40 | 68.30        |
|         | Non-karst | 3035.63 | 1569.05 | 123.89 | 725.91 | 530.54 | 86.24        |
| 2016    | Karst     | 1894.65 | 720.97  | 55.62  | 548.34 | 540.67 | 29.05        |
|         | Non-karst | 1992.42 | 925.26  | 93.30  | 496.73 | 556.33 | -79.20       |
| Average | Karst     | 1718.27 | 677.33  | 46.10  | 492.72 | 530.56 | 28.44        |
|         | Non-karst | 1817.29 | 749.61  | 81.23  | 443.06 | 532.20 | 11.20        |

PREC is the rainfall in the basin; SURQ is the surface runoff in the basin; LATQ is the lateral runoff; PERC is the recharge of soil to groundwater; ET is the actual evapotranspiration.
